# Supplementary material for: First record of the family Sphyrapodidae Guţu, 1980 (Crustacea: Peracarida: Apseudomorpha) with the description of a new species of Sphyrapus from the Colombian Caribbean
Source: PeerJ. 2017 Oct 19;5:e3947. doi: 10.7717/peerj.3947 (PMC5653282; doi:10.7717/peerj.3947)
Supplement: Supplemental Information 1 — Geographical information, physicochemical data and specimens of Spyrapodids used in this study. [file peerj-05-3947-s001.xlsx]

## Sheet: Sheet1
Station	Family	Species	Depth (m)	Temperature (°C)	pH	Salinity (ppm)	Dissolved Oxygen (mg/L)	Mud and Clay (%)	Geográficas WGS84		Remarks
									Lat	Long
E07Col5	Sphyrapodidae	Kudinopasternakia siegi	2380	4.1	7.95	35	4.7	95.6	9°20´31.73"N	76°53´30.67"W	Female
E12Col5	Sphyrapodidae	Sphyrapus caribensis	3010	4.1	7.99	35	4.7	94.9	9°46´52.69"N	76°57´37.72"W	Female (dissected)
E13Col5	Sphyrapodidae	Sphyrapus caribensis	2945	4.1	7.96	35	4.7	93.7	9°55´53.50"N	76°47´19.13"W	Female (Holotype)
E14Col5	Sphyrapodidae	Sphyrapus caribensis	3094	4.1	7.96	35	4.7	95	10°7´26.68"N	76°47´40.39"W	Female (fragments)
E06PAC	Sphyrapodidae	Kudinopasternakia siegi	2229	4.1	8	35	6.8	93.3	9°18´53.84"N	76°48´35.95"W	Female
E15PAC	Sphyrapodidae	Sphyrapus caribensis	2821	4.1	8	35	6.7	98	10°22´0.2"N	76°27´5.17"W	Male (Paratype)
E06FNA	Sphyrapodidae	Kudinopasternakia siegi	2206	4.1	7.93	35	6.8	94.67	10°26´55.54"N	76°15´25.29"W	Female (juvenile)
